# Supplementary material for: mHealth Intervention for Improving Pain, Quality of Life, and Functional Disability in Patients With Chronic Pain: Systematic Review
Source: PubMed Central journal article supplement (PMC9936365; doi:10.2196/40844), 2023-02-02
Supplement: mhealth_v11i1e40844_app1.pdf [file mhealth_v11i1e40844_app1.pdf]

**Multimedia Appendix 1.** Complete search strategy.

|                                          |                                                                                                                                                                                                                                                                                                                                                                   |
|------------------------------------------|-------------------------------------------------------------------------------------------------------------------------------------------------------------------------------------------------------------------------------------------------------------------------------------------------------------------------------------------------------------------|
| Step #1 related to chronic conditions    | Search (pain* OR "chronic pain" OR "persistent pain" OR ache* OR fibromyalgia OR "chronic migraine" OR "chronic headache" OR lumbago OR lumbalgia OR dorsalgia OR "irritable bowel syndrome" OR "temporomandibular disorder pain" OR "burning mouth syndrome" OR osteoarthritis OR spondylosis OR neuropath* OR "trigeminal neuralgia" OR "tolosa-Hunt syndrome") |
| Step #2 related to mHealth interventions | Search (mhealth OR "m-health" OR smartphone OR mobile* OR iphone OR ipad) (app OR apps OR application*)                                                                                                                                                                                                                                                           |
| Step #5 related to mHealth interventions | Search (app OR apps OR application*)                                                                                                                                                                                                                                                                                                                              |
| Step #4 related to study design          | Search ("randomized controlled trial*" OR "randomised controlled trial*" OR "controlled clinical trial*" OR "randomized clinical trial*" OR "randomised clinical trial" OR "clinical trial*")                                                                                                                                                                     |
| Step #5                                  | Search (#1 AND #2 AND #3 AND #4)                                                                                                                                                                                                                                                                                                                                  |
